# Supplementary material for: Transition from Schottky to Ohmic contacts in 2D Ge/GaAs heterostructures with high tunneling probability
Source: Royal Society of Chemistry journal article supplement (doi:10.1039/d3cp06189b), 2024-01-01
Supplement: d3cp06189b1.pdf [file d3cp06189b1.pdf]

Supporting Information for

## **Transition from Schottky to Ohmic Contacts in 2D Ge/GaAs Heterostructure with High Tunneling Probability**

Yang Shen<sup>1,2,\*</sup>, Jianfeng Zhu<sup>1</sup>, Qihao Zhang<sup>1</sup>, Hua Zhu<sup>1</sup>, Qianglong Fang<sup>1,3</sup>,

Xiaodong Yang<sup>4</sup> and Baolin Wang<sup>5</sup>

<sup>1</sup>*Institute of Optical and Electronic Technology, China Jiliang University, Hangzhou 310018, P. R. China*

<sup>2</sup>*School of Materials Science and Engineering, Zhejiang University, Hangzhou 310027, P. R. China*

<sup>3</sup>*School of Physics, Southeast University, Nanjing 211189, P. R. China*

<sup>4</sup>*Key Laboratory of Ecophysics and Department of Physics, Shihezi University, Xinjiang 832003, P. R. China*

<sup>5</sup>*College of Physical Science and Technology, Nanjing Normal University, Nanjing 210023, P. R. China*

\*Correspondence and requests for materials should be addressed to Y. Shen (yshen@cjlu.edu.cn).

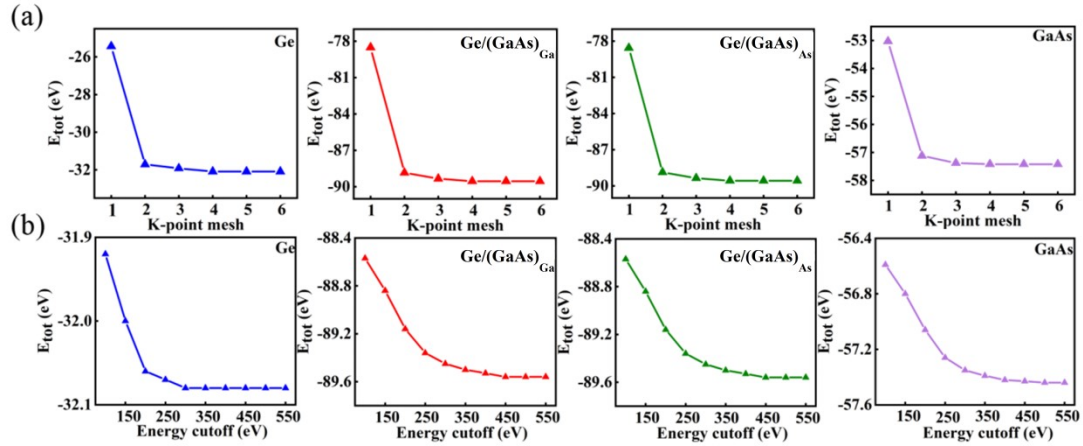

**Fig. S1** The total energies ( $E_{tot}$ ) of Germanene, GaAs monolayer,  $Ge/(GaAs)_{Ga}$  heterostructure, and  $Ge/(GaAs)_{As}$  heterostructure with different k-point mesh (a) and energy cutoff (b).

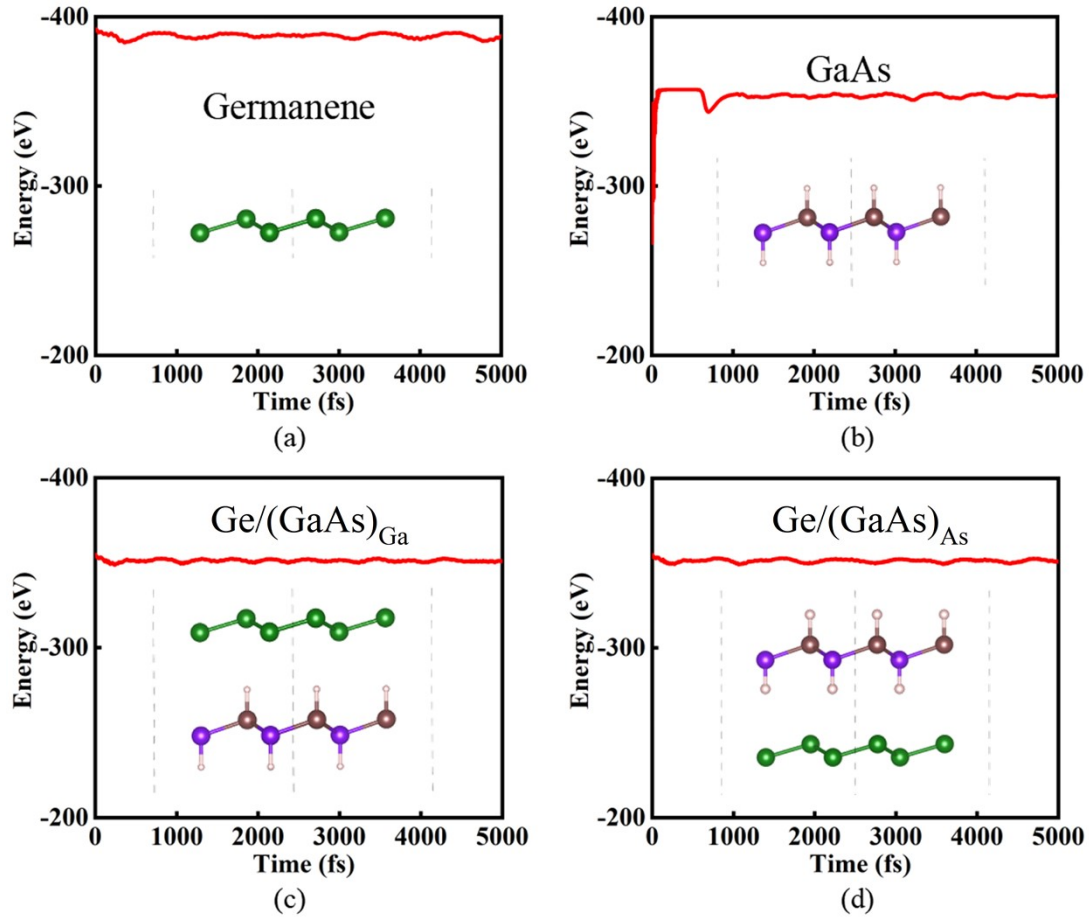

**Fig. S2** The most energetically favorable stacking configuration of (a) Germanene monolayer, (b) GaAs monolayer, (c)  $Ge/(GaAs)_{Ga}$  heterostructure, (d)  $Ge/(GaAs)_{As}$  heterostructure.

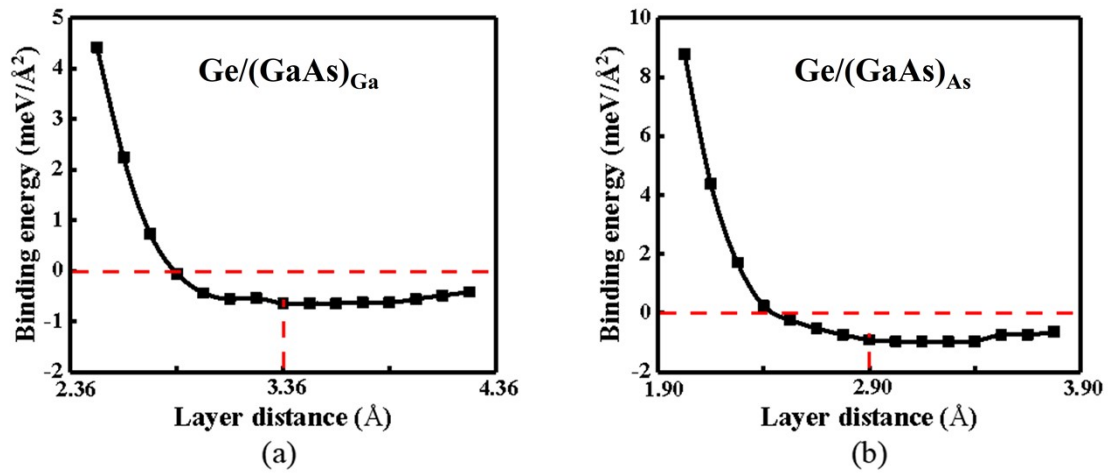

**Fig. S3** The binding energies for Ge/GaAs heterostructures under different layer distance (a) Ge/(GaAs)<sub>Ga</sub> heterostructure, (b) Ge/(GaAs)<sub>As</sub> heterostructure.

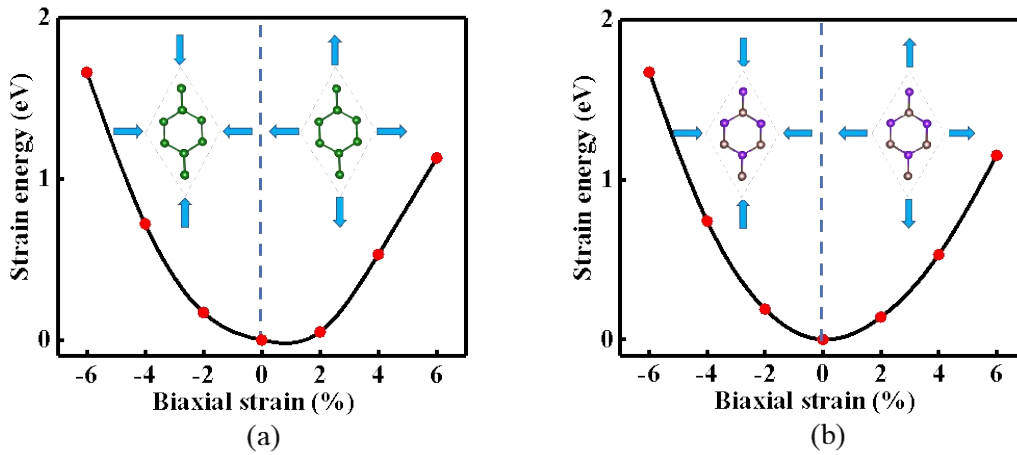

**Fig. S4** The strain energies for Ge/GaAs heterostructures under different biaxial strain (a) Ge/(GaAs)<sub>Ga</sub> heterostructure, (b) Ge/(GaAs)<sub>As</sub> heterostructure.

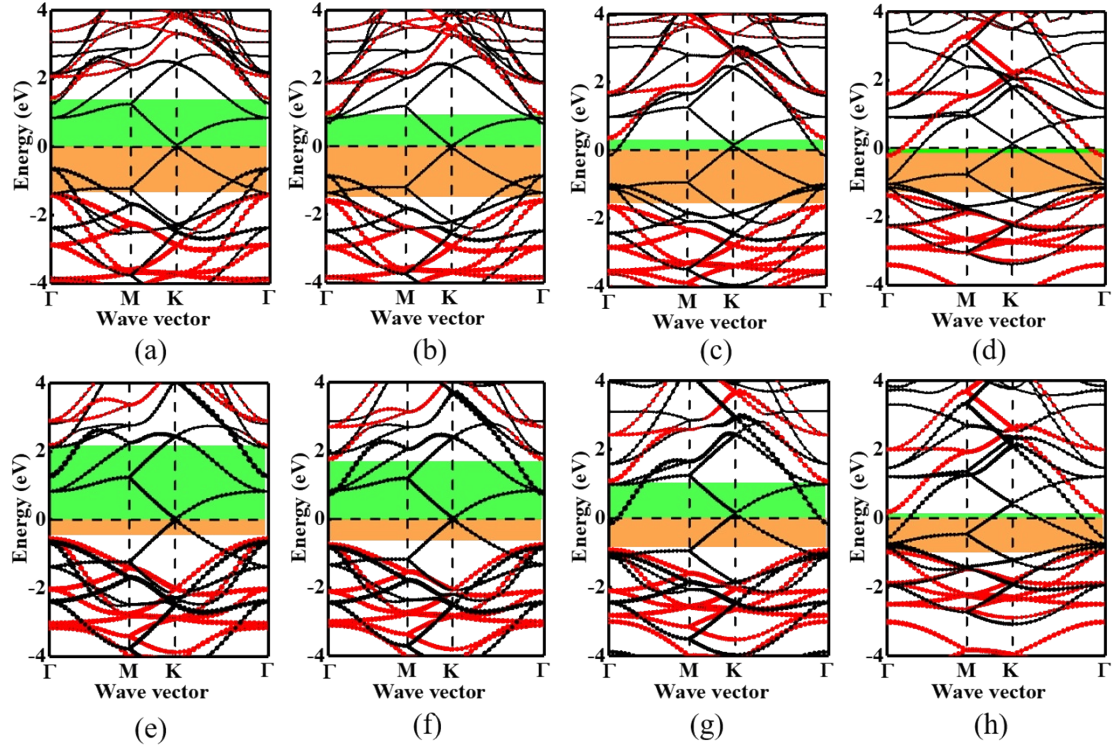

**Fig. S5** The band structure of Ge/(GaAs)<sub>Ga</sub> under (a) -2%, (b)0%, (c)4%, (d)12%, strain, of Ge/(GaAs)<sub>As</sub> under (e) -2%, (f)0%, (g)4%, (h)12% strain. The light green and light brown areas indicate the  $\Phi_e$  and  $\Phi_h$ , respectively.

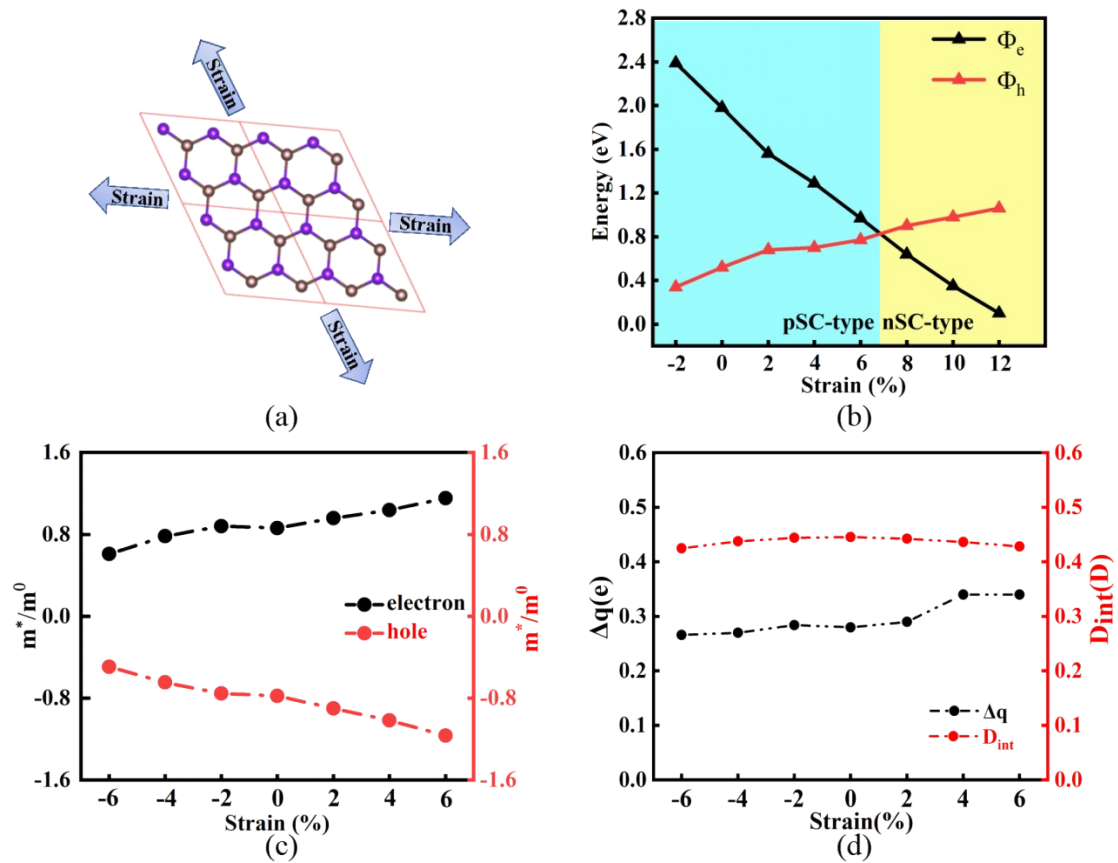

**Fig. S6** The electronic properties of Ge/(GaAs)<sub>As</sub> heterostructure under different biaxial strain (a) The diagram of tensile biaxial strain, (b) The SBH for electron ( $\Phi_e$ ) and hole ( $\Phi_h$ ), (c) The effective masses of electrons and holes, (d) The charge transfer ( $\Delta q$ ) and interfacial dipole moment ( $D_{int}$ ).

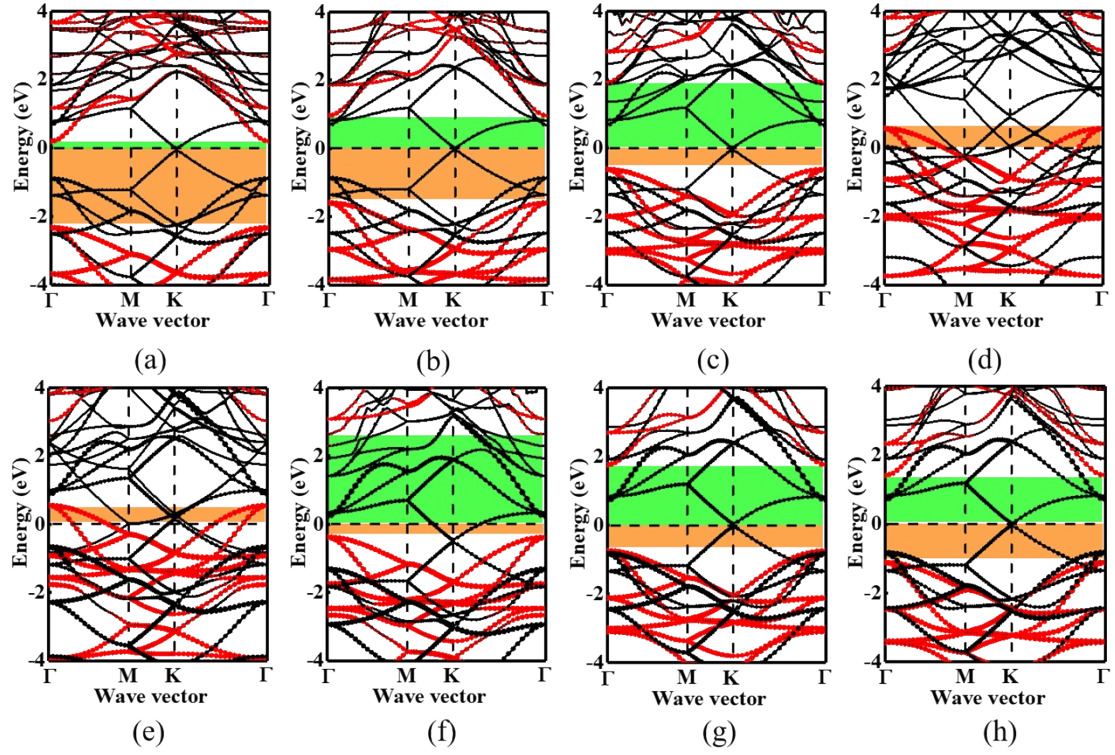

**Fig. S7** The band structure of  $\text{Ge}/(\text{GaAs})_{\text{Ga}}$  under (a)  $-0.2 \text{ (V/\text{\AA})}$ , (b)  $0 \text{ (V/\text{\AA})}$ , (c)  $0.4 \text{ (V/\text{\AA})}$ , (d)  $1 \text{ (V/\text{\AA})}$  electric fields, of  $\text{Ge}/(\text{GaAs})_{\text{As}}$  under (e)  $-0.2 \text{ (V/\text{\AA})}$ , (f)  $0 \text{ (V/\text{\AA})}$ , (g)  $0.4 \text{ (V/\text{\AA})}$ , (h)  $1 \text{ (V/\text{\AA})}$  electric fields. The light green and light brown areas indicate the  $\Phi_e$  and  $\Phi_h$ , respectively.

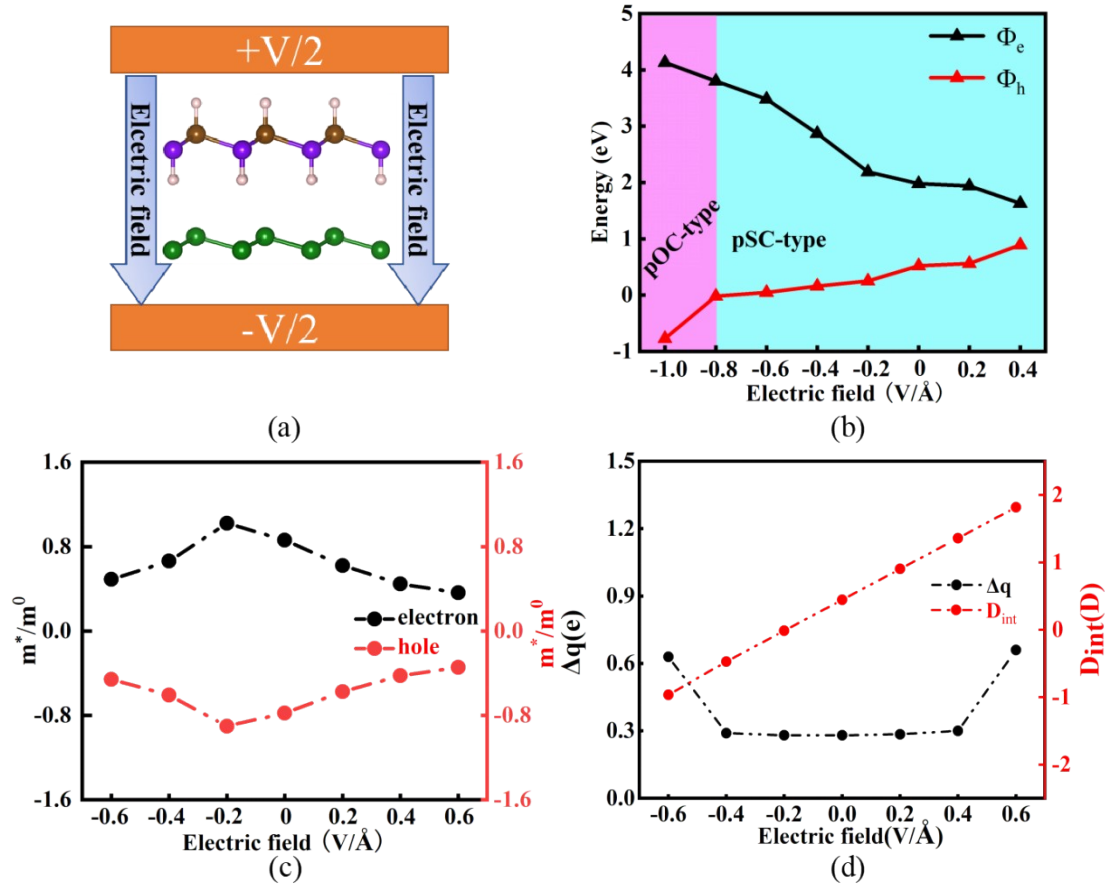

**Fig. S8** The electronic properties of Ge/(GaAs)<sub>As</sub> heterostructure under different electric fields (a) The diagram of positive electric field, (b) The SBH for electron ( $\Phi_e$ ) and hole ( $\Phi_h$ ), (c) The effective masses of electrons and holes, (d) The charge transfer ( $\Delta q$ ) and interfacial dipole moment ( $D_{int}$ ).

**Table S1** The computed tunneling barrier width ( $W_{TB}$ ), tunneling barrier height ( $H_{TB}$ ), and tunneling probability of carriers ( $P_{TB}$ ) of Ge/GaAs heterostructure under different strain.

| <b>Ge/(GaAs)<sub>Ga</sub></b>   |       |       |       |       |       |       |       |
|---------------------------------|-------|-------|-------|-------|-------|-------|-------|
| <b>Strain (%)</b>               | -6    | -4    | -2    | 0     | 2     | 4     | 6     |
| <b><math>W_{TB}</math> (Å)</b>  | 2.81  | 2.85  | 2.89  | 2.90  | 2.95  | 2.96  | 2.97  |
| <b><math>H_{TB}</math> (eV)</b> | 2.43  | 2.38  | 2.33  | 2.26  | 2.23  | 2.12  | 2.05  |
| <b><math>P_{TB}</math> (%)</b>  | 1.55  | 1.64  | 1.73  | 1.95  | 1.98  | 2.39  | 2.69  |
| <b>Ge/(GaAs)<sub>As</sub></b>   |       |       |       |       |       |       |       |
| <b>Strain (%)</b>               | -6    | -4    | -2    | 0     | 2     | 4     | 6     |
| <b><math>W_{TB}</math> (Å)</b>  | 1.37  | 1.42  | 1.51  | 1.53  | 1.46  | 1.53  | 1.54  |
| <b><math>H_{TB}</math> (eV)</b> | 0.94  | 0.96  | 0.98  | 1.03  | 0.92  | 0.91  | 0.89  |
| <b><math>P_{TB}</math> (%)</b>  | 32.43 | 31.01 | 29.15 | 27.14 | 32.05 | 31.60 | 32.29 |

**Table S2** The computed tunneling barrier width ( $W_{TB}$ ), tunneling barrier height ( $H_{TB}$ ), and tunneling probability of carriers ( $P_{TB}$ ) of Ge/GaAs heterostructure under different electric field.

| <b>Ge/(GaAs)<sub>Ga</sub></b>   |      |      |      |      |      |      |      |
|---------------------------------|------|------|------|------|------|------|------|
| <b>Electric field (V/Å)</b>     | -0.6 | -0.4 | -0.2 | 0    | 0.2  | 0.4  | 6    |
| <b><math>W_{TB}</math> (Å)</b>  | 2.39 | 2.84 | 2.87 | 2.90 | 2.91 | 2.93 | 2.94 |
| <b><math>H_{TB}</math> (eV)</b> | 1.98 | 2.33 | 2.30 | 2.26 | 2.25 | 2.23 | 2.21 |
| <b><math>P_{TB}</math> (%)</b>  | 4.36 | 1.80 | 1.85 | 1.94 | 1.97 | 2.01 | 2.07 |
| <b>Ge/(GaAs)<sub>Ga</sub></b>   |      |      |      |      |      |      |      |
| <b>Electric field (V/Å)</b>     | -0.6 | -0.4 | -0.2 | 0    | 0.2  | 0.4  | 6    |
| <b><math>W_{TB}</math> (Å)</b>  | 1.67 | 1.63 | 1.55 | 1.53 | 1.49 | 1.48 | 1.50 |
| <b><math>H_{TB}</math> (eV)</b> | 1.08 | 1.05 | 1.04 | 1.03 | 1.03 | 1.03 | 1.03 |
| <b><math>P_{TB}</math> (%)</b>  | 24.0 | 25.3 | 26.5 | 27.1 | 27.6 | 27.7 | 27.5 |
